# Supplementary material
Source: PubMed Central journal article supplement (PMC6204085)
Supplement: NIHMS964639-supplement-Supp_info.pdf [file NIHMS964639-supplement-Supp_info.pdf]

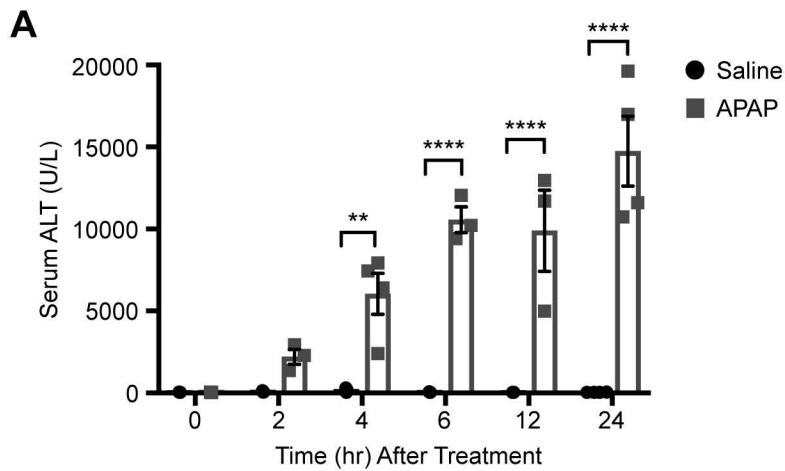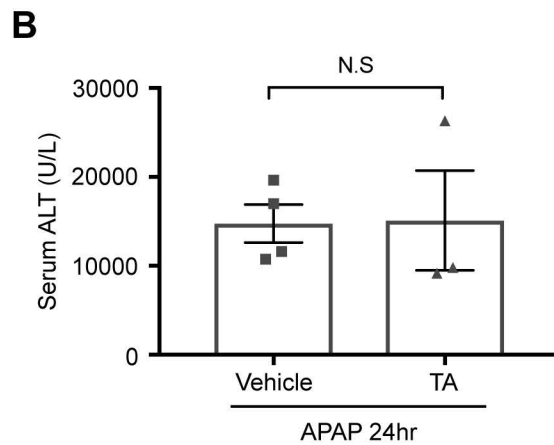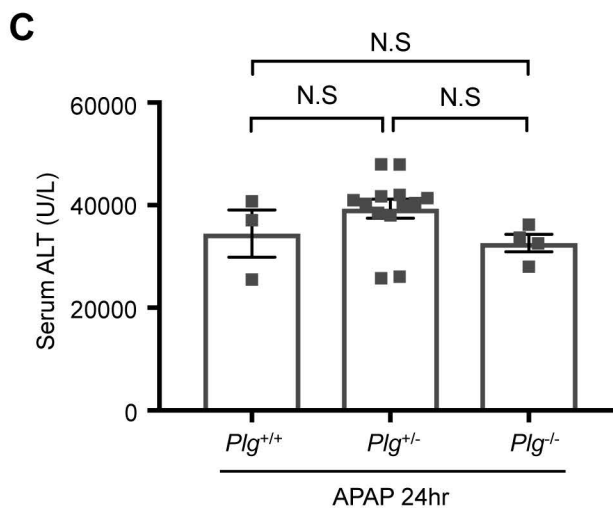

**Supplemental Fig. 1: Hepatotoxicity in APAP-treated mice.** Serum alanine aminotransferase (ALT) levels were measured upon euthanasia at indicated times after APAP overdose as an indicator of hepatotoxicity. (A) Timecourse of ALT accumulation after saline versus APAP treatment. (B) ALT measurements at 24 hr after APAP overdose with additional vehicle (saline) or TA treatment at 2 hr after APAP overdose. (C) ALT measurements in *Plg*<sup>+/+</sup>, *Plg*<sup>+/-</sup>, and *Plg*<sup>-/-</sup> mice at 24hr after APAP overdose. For A-C, data are expressed as mean  $\pm$  SEM, and each symbol represents an individual animal. Statistical analyses were performed using a two-way ANOVA with Bonferroni's multiple comparisons test (A), an unpaired two-tailed t-test (B), and a one-way ANOVA with Dunnett's multiple comparisons test (C); \*\* $P < 0.01$ ; \*\*\*\* $P < 0.0001$ ; N.S.=not significant.



## Supplemental Table 1

### qPCR primers (murine)

| <b>Gene</b>                     | <b>Forward (5' to 3')</b> | <b>Reverse (5' to 3')</b> |
|---------------------------------|---------------------------|---------------------------|
| <i>Plg</i>                      | AGTCCTCAGCATCACCAGAC      | AAACATAGCTGCCCAGGACT      |
| <i>Plau (uPA)</i>               | GAGCCTTGGTGGTGAAAAAC      | TTGTAGGACACGCATACACCT     |
| <i>Plaur (uPAR)</i>             | GGCTTAGATGTGCTGGGAAA      | CAATGAGGCTGAGTTGAGCA      |
| <i>Plat (tPA)</i>               | CTGAGGTCACAGTCCAAGCA      | TCAGCCGCTCAGAGAAGAAT      |
| <i>Gapdh</i>                    | TCAACGGCACAGTCAAGG        | ACTCCACGACATACTCAGC       |
| <i>Rn18s</i>                    | CCCGAAGCGTTTACTTTGAAA     | CGCGGTCCTATTCCATTATTC     |
| <i><math>\beta</math>-actin</i> | TGTTACCAACTGGGACGACA      | GGGGTGTTGAAGGTCTCAA       |
